# Supplementary material for: Association between suicide reporting in the media and suicide: systematic review and meta-analysis
Source: PubMed Central journal article supplement — BMJ. 2020 Mar 18;368:m575. doi: 10.1136/bmj.m575 (PMC7190013; doi:10.1136/bmj.m575), 2020-03-18

**Supplementary Appendix**  
**to**  
**Association between suicide reporting in the media and**  
**suicide:**  
**Systematic review and meta-analysis**

Thomas Niederkrotenthaler, MD PhD\*

Marlies Braun, MPhil

Jane Pirkis, PhD

Benedikt Till, DSc

Steven Stack, PhD

Mark Sinyor, MD

Ulrich S. Tran, DSc

Martin Voracek, DSc, DMSc, PhD

Qijin Cheng, PhD

Florian Arendt PhD

Sebastian Scherr, PhD

Paul S.F. Yip, PhD

Matthew J. Spittal, PhD, MBioStat

## Table of Contents

|                                                                                                                                                                                                                  |    |
|------------------------------------------------------------------------------------------------------------------------------------------------------------------------------------------------------------------|----|
| Studies included in the qualitative and quantitative analyses .....                                                                                                                                              | 3  |
| Risk of bias assessment (based on Robins I-tool) .....                                                                                                                                                           | 7  |
| Table S1: Detailed Characteristics of the Included Studies with Regards to Study Methods.....                                                                                                                    | 13 |
| Table S2: Risk of bias ratings of included studies.....                                                                                                                                                          | 20 |
| Table S3: Multivariate meta-regressions of the effect of reporting of deaths of celebrities by suicide on total suicides by study factors (all studies at moderate risk of bias) .....                           | 22 |
| Table S4: Univariate meta-regressions of the effect of method-specific reporting of deaths of celebrities by suicides on total suicides by study factors (all studies at moderate risk of bias) .....            | 23 |
| Figure S1: Forest plot for sensitivity analyses (all studies at moderate and serious risk of bias)....                                                                                                           | 24 |
| Table S5. Univariate meta-regressions of the effect of reporting on deaths of celebrities by suicide on total suicides by study factors (all studies at moderate and serious risk of bias) .....                 | 26 |
| Table S6: Univariate meta-regressions of the effect of method-specific reporting of deaths of celebrities by suicide on total suicides by study factors (all studies at moderate and serious risk of bias) ..... | 27 |
| Figure S2: Funnel plot for sensitivity analyses (all studies at moderate and serious risk of bias) ..                                                                                                            | 28 |

## **Studies included in the qualitative and quantitative analyses**

This section lists all 31 studies used in our qualitative assessment and quantitative analysis. The complete list of included studies is as follows:

### **Bakst 2018**

Bakst SS, Berchenko Y, Braun T, Shohat T. The effects of publicized suicide deaths on subsequent suicide counts in Israel. *Arch Suicide Res.* 2019;23(3):440-54.

### **Chang 2015**

Chang SS, Kwok SSM, Cheng Q, Yip PSF, Chen YY. The association of trends in charcoal-burning suicide with Google search and newspaper reporting in Taiwan: a time-series analysis. *Social Psychiatry and Psychiatric Epidemiology.* 2015;50:1451-61.

### **Chen 2011**

Chen YY, Chen F, Yip PSF. The impact of media reporting of suicide on actual suicides in Taiwan, 2002-05. *Journal of Epidemiology and Community Health.* 2011;65:934-40.

### **Chen 2012**

Chen YY, Liao SF, Teng PR, et al. The impact of media reporting of the suicide of a singer on suicide rates in Taiwan. *Social Psychiatry and Psychiatric Epidemiology.* 2012;47:215-21.

### **Chen 2013**

Chen YY, Chen F, Gunnell D, Yip PSF. The impact of media reporting on the emergence of charcoal burning suicide in Taiwan. *PLOS ONE.* 2013;8:e55000.

### **Cheng 2007**

Cheng ATA, Hawton K, Lee CTC, Chen THH. The influence of media reporting of the suicide of a celebrity on suicide rates: a population-based study. *International Journal of Epidemiology.* 2007;36:1229-34.

### **Cheng 2017**

Cheng Q, Chen F, Yip PSF. Media effects on suicide methods: A case study on Hong Kong 1998-2005. *PLOS ONE.* 2017;12:e0175580.

### **Choi 2016**

Choi YJ, Oh H. Does media coverage of a celebrity suicide trigger copycat suicides? Evidence from Korean cases. *Journal of Media Economics.* 2016;29:92-105.

### **Etzersdorfer 2004**

Etzersdorfer E, Voracek M, Sonneck G. A dose-response relationship of imitational suicides and newspaper distribution. *Archives of Suicide Research.* 2001;8:137-45.

### **Fink 2018**

Fink DS, Santaella-Tenorio J, Keyes K. Increase in suicides in the months after the death of Robin Williams in the US. *PLOS ONE*. 2018;13:e0191405.

### **Fu 2009**

Fu KW, Yip PSF. Estimating the risk of suicide following the suicide deaths of 3 Asian entertainment celebrities: A meta-analytic approach. *Journal of Clinical Psychiatry*. 2009;70:869-78.

### **Hagihara 2007**

Hagihara A, Tarumi K, Abe T. Media suicide-reports, internet use and the occurrence of suicides between 1987 and 2005 in Japan. *BMC Public Health*. 2007;7:321.

### **Jobes 1996**

Jobes DA, Berman AL, O'Carroll PW, Eastgard S, Knickmeyer S. The Kurt Cobain suicide crisis: Perspectives from research, public health and the news media. *Suicide and Life-Threatening Behavior*, 1996;26(3):260–69.

### **Jonas 1992**

Jonas K. Modelling and suicide: A test of the Werther effect. *British Journal of Social Psychology*. 1992;31:295-306.

### **Kessler 1989**

Kessler RC, Downey G, Stipp H, Milavsky JR. Network television news stories about suicide and short term changes in total US suicides. *The Journal of Nervous and Mental Disease*. 1989;177:551-5.

### **Koburger 2015**

Koburger N, Mergl R, Rummel-Kluge C, et al. Celebrity suicide on the railway network: Can one case trigger international effects? *Journal of Affective Disorders*. 2015;185:38-46.

### **Koepping 1989**

Koepping AP, Hanzeboom HBG, Swanborn PG. Verhoging van suicide in navolging van kranteberichten. *Nederlands Tijdschrift Voor De Psychologie*. 1989;44:62-72.

### **Ladwig 2012**

Ladwig KH, Kunrath S, Lukaschek K, Baumert J. The railway suicide death of a famous German football player: Impact of the subsequent frequency of railway suicide acts in Germany. *Journal of Affective Disorders*. 2012;136:194-8.

### **Lee 2019**

Lee SY. Do effects of copycat suicides vary with reasons for celebrity suicides reported in the media? *The Social Science Journal*. 2019 April; doi.org/10.1016/j.soscij.2019.03.003. [Epub ahead of print]

### **Mockus 2018**

Mockus D. Analyzing the Werther effect: The impact of media reporting of celebrity suicides on suicides. Unpublished manuscript; 2018. Available from [https://www.researchgate.net/publication/328644531\\_Analyzing\\_the\\_Werther\\_Effect\\_The\\_Impact\\_of\\_Media\\_Reporting\\_of\\_Celebrity\\_Suicide\\_on\\_Suicides](https://www.researchgate.net/publication/328644531_Analyzing_the_Werther_Effect_The_Impact_of_Media_Reporting_of_Celebrity_Suicide_on_Suicides)

### **Niederkrotenthaler 2009**

Niederkrotenthaler T, Till B, Kapusta ND, Voracek M, Dervic K, Sonneck G. Copycat effects after media reports on suicide: a population-based ecologic study. *Social Science & Medicine*. 2009;69:1085-90.

### **Phillips 1974**

Phillips DP. The influence of suggestion on suicide: substantive and theoretical implications of the Werther effect. *American Sociological Review*. 1974;39:340-54.

### **Pirkis 2020**

Pirkis J, Currier D, Too LS, et al. Suicides in Australia following media reports of the death of Robin Williams. *Australian and New Zealand Journal of Psychiatry*. 2020;54:99-104.

### **Queinec 2011**

Queinec R, Beitz C, Contrand B, et al. Copycat effect after celebrity suicides: results from the French national death register. *Psychological Medicine*. 2011;41:668-71.

### **Romer 2006**

Romer D, Jamieson P, Jamieson KH. Are news reports of suicide contagious? A stringent test in six U.S. cities. *Journal of Communication*. 2006;56:253-70.

### **Ruddigkeit 2010**

Ruddigkeit A. Der umgekehrte Werther-Effekt. Eine quasi-experimentelle Untersuchung von Suizidberichterstattung und deutscher Suizidrate. *Publizistik*. 2010;55:253-73.

### **Schafer 2015**

Schafer M, Quiring O. The press coverage of celebrity suicide and the development of suicide frequencies in Germany. *Health Communication*. 2015;30:1149-58.

### **Stack 1996**

Stack S. The effect of the media on suicide: evidence from Japan, 1955-1985. *Suicide and Life-Threatening Behavior*. 1996;26:132-42.

### **Ueda 2014**

Ueda M, Mori K, Matsubayashi T. The effects of media reports of suicide by well-known figures between 1989 and 2010 in Japan. *International Journal of Epidemiology*. 2014;43: 623-9.

**Ueda 2017**

Ueda M, Mori K, Matsubayashi T, Sawada T. Tweeting celebrity suicides: Users' reaction to prominent suicide deaths and subsequent increases in actual suicides. *Social Science & Medicine*. 2017;189:158-66.

**Whitley 2019**

Whitley R, Fink DS, Santaella-Tenorio J, Keyes KM. Suicide mortality in Canada after the death of Robin Williams, in the context of high-fidelity to suicide reporting guidelines in the Canadian media. *The Canadian Journal of Psychiatry*. 2019 Jun 10. doi: 10.1177/0706743719854073.

## Risk of bias assessment (based on Robins I-tool)

| A: Pre-intervention and at-intervention aspects                                                                                                                                                                                                                                                                                                                                                                                                                                                                                                                                                                                                                                                                                                                                                                                                                                                                                                                                                                                                                                                                                                                                                                                                                                                                                                                                                                                                                                                                                                                                                                                                                                                                                                                                                                                                                                                                                                                                                                                                                                                                                                                                                                                                                                                                           |                                                                                                                                                                                                                                                                                                                                                                                                                           |                                                                                                                                                                                                                                                                                                                                                                |
|---------------------------------------------------------------------------------------------------------------------------------------------------------------------------------------------------------------------------------------------------------------------------------------------------------------------------------------------------------------------------------------------------------------------------------------------------------------------------------------------------------------------------------------------------------------------------------------------------------------------------------------------------------------------------------------------------------------------------------------------------------------------------------------------------------------------------------------------------------------------------------------------------------------------------------------------------------------------------------------------------------------------------------------------------------------------------------------------------------------------------------------------------------------------------------------------------------------------------------------------------------------------------------------------------------------------------------------------------------------------------------------------------------------------------------------------------------------------------------------------------------------------------------------------------------------------------------------------------------------------------------------------------------------------------------------------------------------------------------------------------------------------------------------------------------------------------------------------------------------------------------------------------------------------------------------------------------------------------------------------------------------------------------------------------------------------------------------------------------------------------------------------------------------------------------------------------------------------------------------------------------------------------------------------------------------------------|---------------------------------------------------------------------------------------------------------------------------------------------------------------------------------------------------------------------------------------------------------------------------------------------------------------------------------------------------------------------------------------------------------------------------|----------------------------------------------------------------------------------------------------------------------------------------------------------------------------------------------------------------------------------------------------------------------------------------------------------------------------------------------------------------|
| <b>I Bias due to confounding</b>                                                                                                                                                                                                                                                                                                                                                                                                                                                                                                                                                                                                                                                                                                                                                                                                                                                                                                                                                                                                                                                                                                                                                                                                                                                                                                                                                                                                                                                                                                                                                                                                                                                                                                                                                                                                                                                                                                                                                                                                                                                                                                                                                                                                                                                                                          | <b>TOTAL domain 1:</b><br><b>Low:</b> no confounding expected<br><b>Moderate:</b> some confounding expected; typically all subdomains appropriately controlled for (clarifications provided below) and reliability of measurement of these domains appears sufficient<br><b>Serious:</b> at least one domain not measured or controlled, or reliability low<br><b>Critical:</b> unmeasured confounding strongly suggested | <b>SUBDOMAINS<sup>s</sup> (Code YES or NO):</b><br><br><b>A NO if:</b> Sufficient pre-intervention time-points measured<br><br><b>B YES if:</b> No appropriate analysis method that accounts for time trends<br><br><b>C YES if:</b> Seasonality not accounted for ( <i>if applicable</i> )<br><br><b>D YES if:</b> No confounders measured and controlled for |
| <p><b>General comments domain 1:</b><br/>           Because <i>no confounding expected</i> generally does not apply to the study designs included in our study, the best possible rating in domain 1 is moderate risk of bias. Other aspects should be considered when judging the potential of bias due to confounding:</p> <p><b>Subdomain A:</b> Studies with only one pre-intervention time point are coded Yes in this subdomain (meaning, pre-intervention number of time points is not sufficient to account for time trends). However, this might still be consistent with moderate risk in domain one, particularly if follow-up is short and measures are taken to control for time trend/baseline suicide risk (see below, subdomain b).</p> <p><b>Subdomain B:</b> Time trends can be accounted for using modelling techniques (e.g. autoregressive/moving average components,<sup>1</sup> first differencing,<sup>1</sup> lagged dependent variables,<sup>2</sup> variables for trend such as a linear variable for time and/or indicator variables for trend, e.g. year-months),<sup>3</sup> or through study design (e.g. calculations of expected frequencies based on measuring the outcome at time points both before <i>and</i> after the end of the follow-up period).<sup>4</sup> If, in a pre-post comparison without any corrections using indicator variables for trend, and only data points from <i>before</i> the intervention are used for the comparison and there is no consideration of data points from <i>after</i> the follow-up (intervention) period,<sup>5</sup> then this is not sufficient to adequately address possible bias from time patterns. Subdomain B should then be coded Yes. If an ITS design is used, controlling for time with an <i>annual</i> indicator variable alone is not sufficient to control for time trends.<sup>6</sup> This should also be coded Yes. A Yes in subdomain B means that domain 1 is at serious risk of bias (or higher).</p> <p><b>Subdomain C:</b> Confounding might arise from comparing different seasons before and after the intervention (e.g. spring vs. winter). In case of daily outcome data, patterns across a week count as seasonality. In these cases, adjustments in the study design need to be made accordingly (e.g.</p> |                                                                                                                                                                                                                                                                                                                                                                                                                           |                                                                                                                                                                                                                                                                                                                                                                |

using monthly indicator variables for seasonality patterns,<sup>2</sup> or day-of-the-week indicator variables for a weekly pattern<sup>3</sup>) in order to code as No in this subdomain. If seasonality is not addressed in these analyses, code Yes for this subdomain. A Yes in subdomain C means that domain 1 is at serious risk (or higher).

**Subdomain D:** The absence of adjustment for confounders means that subdomain D is coded as Yes. There is, however, no general consensus on which specific confounders (e.g. unemployment, divorce rates, temperature)<sup>2,7</sup> need to be incorporated in the analysis of suicide counts. Also, some analysis techniques are less prone to bias due to confounding because of the way the underlying structure of the data is modelled (e.g. ARIMA modelling).<sup>1</sup> Others control for possible confounders by year-month variables that allow the baseline suicides to differ between each month<sup>3</sup> (thereby accounting for other factors that change at the monthly level). Some pre-post designs use components of the time series with many interventions but short follow-up periods (to compare suicides in a few weeks before and after the intervention),<sup>8</sup> and adjustments for longer term trends (e.g. unemployment rates) are probably not necessary with these study designs. A study coded as Yes in this subdomain can therefore be still be consistent with moderate risk in domain 1 if it uses an analysis that, to some extent, accounts for the structure of the time series (e.g. uses ARIMA modelling<sup>1</sup>), or if the specific design, e.g. with short follow-up, means adjustments for covariates are unnecessary. If these specifications do not apply this means that domain 1 is at serious risk (or higher).<sup>9</sup>

Absence of adjustment for confounding altogether might result in **critical risk** for example if an intervention period is assumed to be one year long (which is atypical for media effects) although related media interventions are largely restricted to a few weeks after the death.<sup>10</sup>

§ Code specific subdomain as Yes if the specific type of bias is present or probably present; code No if not present or probably not present.

|                                                          |                                                                                                                                                                                                                                                                                                                                                                                           |  |
|----------------------------------------------------------|-------------------------------------------------------------------------------------------------------------------------------------------------------------------------------------------------------------------------------------------------------------------------------------------------------------------------------------------------------------------------------------------|--|
| <p><b>2 Bias in classification of interventions*</b></p> | <p><b>Total domain 2:</b><br/> <b>Low:</b> Specification of pre-and post-intervention time points is consistent with timing of intervention<br/> <b>Moderate:</b> Specification of pre-and post-time points is mainly consistent with intervention<br/> <b>Serious:</b> Specification is not consistent with intervention<br/> <b>Critical:</b> Specification unclear or inconsistent</p> |  |
|----------------------------------------------------------|-------------------------------------------------------------------------------------------------------------------------------------------------------------------------------------------------------------------------------------------------------------------------------------------------------------------------------------------------------------------------------------------|--|

**General comments domain 2:**

\* Code as **low risk of bias** if the timing of intervention is consistent with the measurement of events in time pre- and post-intervention (e.g. the exact date of death is used to define the pre- and post-intervention periods).<sup>11</sup> If this applies only partially (e.g. outcome data is measured weekly but the intervention occurred on a specific day within that week), code **moderate** as long as the assignment is mainly consistent.<sup>2</sup>

If monthly data are used yet the interventions occur anytime within a month (i.e., not at the beginning of the month), code as **serious risk of bias** even if adjustments are made to the assignment of the intervention month (e.g. death of a celebrity by suicide after the 23<sup>rd</sup> of the month are assigned to the following month).<sup>4,12</sup> Exception to this might be if the intervention occurred early in the month, resulting in lower risk of bias as compared to interventions later in the month. Such studies can be coded as moderate risk in this domain.<sup>1</sup>



**Critical bias** occurs for example if, in an ITS study with several interventions, the modelled duration of effects differs widely between interventions. Studies using annual outcome data were excluded from the meta-analysis.

**B Post-intervention aspects**

|                                                |                                                                                                                                                                                                                                                                                                                                                                                                                    |  |
|------------------------------------------------|--------------------------------------------------------------------------------------------------------------------------------------------------------------------------------------------------------------------------------------------------------------------------------------------------------------------------------------------------------------------------------------------------------------------|--|
| <p><b>3 Bias due to preparatory phases</b></p> | <p><b>Total domain 3:</b><br/> <b>Low:</b> There is no reason to assume that there was a preparatory phase before the intervention that might have impacted on the outcome.<br/> <b>Moderate:</b> Any preparatory phases are well-described and adequately accounted for<br/> <b>Serious:</b> Preparatory phases of the intervention that might impact on the outcome appear likely and are not accounted for.</p> |  |
|------------------------------------------------|--------------------------------------------------------------------------------------------------------------------------------------------------------------------------------------------------------------------------------------------------------------------------------------------------------------------------------------------------------------------------------------------------------------------|--|

**General comments domain 3:**

\* This domain is to cover specifically whether the effects of any preparatory (pre-intervention) phases of the intervention that might impact on the outcome were appropriately accounted for. A preparatory phase might be a pre-release promotion for a documentary on suicide which might impact on suicide rates even before its release.

This domain should be coded as low risk of bias if the intervention is about a sudden event (e.g. a death of a celebrity by suicide, which typically happens without preparatory phases). Also, code as low risk of bias if any preparatory phases were likely limited in terms of reach in the population (e.g. before the publication of a specialized book on suicide).<sup>13</sup> Code as moderate if preparatory phases are likely but accounted for (e.g. by excluding the preparatory phase from the pre-intervention phase of the time series). Code as serious if such preparatory phases are not adequately accounted for.

|                                           |                                                                                                                                                                                                                                                                                                                                                                                                                                                                                                                                                                                                    |  |
|-------------------------------------------|----------------------------------------------------------------------------------------------------------------------------------------------------------------------------------------------------------------------------------------------------------------------------------------------------------------------------------------------------------------------------------------------------------------------------------------------------------------------------------------------------------------------------------------------------------------------------------------------------|--|
| <p><b>4 Bias due to missing data*</b></p> | <p><b>Total domain 4:</b><br/> <b>Low:</b> data appear reasonably complete based on published information, <i>OR</i> the analysis addressed missing data and is likely to have removed any risk of bias<br/> <b>Moderate:</b> missing data points appear to be more frequent before or after the intervention; <i>OR</i> the analysis is unlikely to have removed the risk of bias arising from missing data.<br/> <b>Serious:</b> (i) Missing data differ substantially across time points; and (ii) the analysis is unlikely to have removed the risk of bias arising from the missing data.</p> |  |
|-------------------------------------------|----------------------------------------------------------------------------------------------------------------------------------------------------------------------------------------------------------------------------------------------------------------------------------------------------------------------------------------------------------------------------------------------------------------------------------------------------------------------------------------------------------------------------------------------------------------------------------------------------|--|

**General comments domain 4:**

\*Missing data in the context of our study means that suicide data are not available for all time points. This is rarely a problem when it comes to the total numbers of deaths drawn from national mortality databases but might be a problem with international datasets where countries report data infrequently, or in regional datasets. Some studies indicate some missing data and should be coded accordingly.<sup>14</sup> With regard to national datasets, if not reported differently in the study, reasonable completeness of data can be assumed in industrialized countries and these studies can be coded as low risk of bias in this domain. If preliminary data from regional databases are used and no information on missing values is provided, code unknown.<sup>15</sup>

|                                                                                                                                                                                                                                                                                                                                                                                                                                                                                                                                                                                                                                                                                                                                                                                                                                                                                                                                                                                                                                                                                                                                                                                                                                                                                                                                                                                                                                                                                                                                                                                                           |                                                                                                                                                                                                                                                                                                                                                                                                                                                                                                                                                                                                                                                                                                                                                                                                                                                                                                                                                                                                                                                                                                                                                    |                                                                                                                                                                                                                                                                             |
|-----------------------------------------------------------------------------------------------------------------------------------------------------------------------------------------------------------------------------------------------------------------------------------------------------------------------------------------------------------------------------------------------------------------------------------------------------------------------------------------------------------------------------------------------------------------------------------------------------------------------------------------------------------------------------------------------------------------------------------------------------------------------------------------------------------------------------------------------------------------------------------------------------------------------------------------------------------------------------------------------------------------------------------------------------------------------------------------------------------------------------------------------------------------------------------------------------------------------------------------------------------------------------------------------------------------------------------------------------------------------------------------------------------------------------------------------------------------------------------------------------------------------------------------------------------------------------------------------------------|----------------------------------------------------------------------------------------------------------------------------------------------------------------------------------------------------------------------------------------------------------------------------------------------------------------------------------------------------------------------------------------------------------------------------------------------------------------------------------------------------------------------------------------------------------------------------------------------------------------------------------------------------------------------------------------------------------------------------------------------------------------------------------------------------------------------------------------------------------------------------------------------------------------------------------------------------------------------------------------------------------------------------------------------------------------------------------------------------------------------------------------------------|-----------------------------------------------------------------------------------------------------------------------------------------------------------------------------------------------------------------------------------------------------------------------------|
| <p><b>5 Bias in measurement of the outcome*</b></p>                                                                                                                                                                                                                                                                                                                                                                                                                                                                                                                                                                                                                                                                                                                                                                                                                                                                                                                                                                                                                                                                                                                                                                                                                                                                                                                                                                                                                                                                                                                                                       | <p><b>Total domain 5:</b><br/> <b>Low:</b> Any error in measuring the outcome is unrelated to intervention status<br/> <b>Moderate:</b> Any error in measuring outcome is only minimally related to intervention status<br/> <b>Serious:</b> Error in measuring the outcome is entirely possible and related to intervention status.</p>                                                                                                                                                                                                                                                                                                                                                                                                                                                                                                                                                                                                                                                                                                                                                                                                           |                                                                                                                                                                                                                                                                             |
| <p><b>General comment domain 5:</b></p> <p>*Bias in outcome measurement can arise if methods of outcome assessment were not fully comparable before and after the intervention and if there were systematic changes in the measurement of the outcome coincident with the implementation of the intervention. There are two ways this could occur in studies on mortality. First, this type of bias might occur if there were changes in the coding system, e.g. from ICD-9 to ICD-10, although studies have shown that this has minimal impact on the ascertainment of suicide as ICD-9 and ICD-10 are highly consistent for coding suicide (see <sup>16</sup> for related considerations). Therefore, such changes are still consistent with a code of low risk of bias.</p> <p>A second way this could occur is if there are abrupt changes in the likelihood of registering the death as suicide due to a <i>coroner's effect</i>. Specifically, high media attention on the topic of suicide might result in an increased likelihood of coroners coding suicides as the cause of death. Based on available studies, such effects, should typically be small (consistent with low risk; see <sup>17</sup> for related considerations), but they would be problematic if the collecting entities were directly involved in the study (e.g. if coroners are made aware of a suicide method and suicide data is subsequently collected directly from them).<sup>15</sup> We expect that this type of bias is relatively rare as most studies draw on national death registries to identify suicides.</p> |                                                                                                                                                                                                                                                                                                                                                                                                                                                                                                                                                                                                                                                                                                                                                                                                                                                                                                                                                                                                                                                                                                                                                    |                                                                                                                                                                                                                                                                             |
| <p><b>6 Bias in selection of reported results</b></p>                                                                                                                                                                                                                                                                                                                                                                                                                                                                                                                                                                                                                                                                                                                                                                                                                                                                                                                                                                                                                                                                                                                                                                                                                                                                                                                                                                                                                                                                                                                                                     | <p><b>Total domain 6:</b><br/> <b>Low:</b> Clear evidence, usually from pre-registered protocol, that all results are reported without selective reporting with regard to conducted methods; time-points included; or subgroups of suicides analysed.<br/> <b>Moderate:</b> The outcome measurements and analyses are consistent with an a priori-plan; OR are clearly defined and appear both internally and externally consistent AND there is no indication of selection of the reported analysis from among multiple analyses; AND there is no indication of selection of a subgroup of suicides for reporting on the basis of the results<br/> <b>Serious:</b> Outcomes are defined in different ways in the methods and results sections, OR there is a high risk of selective reporting from among multiple analyses; OR the subgroup is selected from a larger study for analysis and appears to be reported on the basis of the results.<br/> <b>Critical:</b> There is evidence or strong suspicion of selective reporting of results AND the unreported results are likely to be substantially different from the reported results.</p> | <p><b>SUBDOMAINS<sup>§</sup>:</b></p> <p><b>A YES if:</b> selection of time point within series</p> <p><b>B YES if:</b> selection of method from several conducted methods</p> <p><b>C YES if:</b> Selection of results because of interest, but more results available</p> |

### General comments on domain 6:

This bias includes three types of selective reporting: (I) an effect estimate for the outcome is selected from among multiple measurements with the same analysis method, for example a measurement made at one of a number of time points is selected, or (II) reported results are selected from intervention effects estimated with different analysis methods; or (III) if results are selected for a subgroup of data on the basis of more interesting findings.

In the absence of a published study protocol, the best possible rating in this domain is moderate risk of bias.

For the considered studies, some possible reporting bias in general and across all studies results from different selections of follow-up periods, but it is not possible to say which specific duration is appropriate as there is no general agreement on the duration of media effects and there is a reasonable possibility of strong variations in effect duration. For this reason, only follow-up periods up to two months were included in this meta-analysis.

**Risk in the specific subdomains (A-C)** should be coded positive / probably positive (Yes) if they might reasonably bias the findings in the meta-analysis in addition to the general points above. For example, studies sometimes conduct analyses for several demographic subgroups and then focus primarily on one of them -- but this would not introduce bias in this meta-analysis which always uses total suicides for the total population in the primary analysis, and total suicides by specific methods consistent with method used by the celebrity in secondary analysis 1. Further, if studies present several study methods that deliver consistent results, this does not indicate additional risk of bias (here, in subdomain B). If, on the other hand, several time periods are tried out and only one or a few are reported, this does affect the risk of bias in this meta-analysis, resulting in a code of Yes (in subdomain A).<sup>18</sup> Similarly, subdomain C would be coded Yes if important design decisions, e.g. related to collecting intervention data is based on the results.<sup>18</sup> Any Yes in subdomains A-C means that risk of bias in domain 6 is serious (or higher). Any strong suspicion of selective reporting, e.g. if there are relevant design decisions that are not explained and unusual and reported associations are very close to boundary of non-significance) mean there is critical risk.<sup>19</sup>

§ Code specific subdomains as Yes if the specific type of bias is present or probably present; code No if not present or probably not present.

### References for risk of bias reporting tool with examples

1. Fink DS, Santaella-Tenorio J, Keyes KM. Increase in suicides in the months after the death of Robin Williams in the US. *PLOS One*. 2018;13:e0191405.
2. Chang SS, Kwok SS, Cheng Q, Yip PS, Chen YY. The association of trends in charcoal-burning suicide with Google search and newspaper reporting in Taiwan: a time-series analysis. *Soc Psychiatry Psychiatr Epidemiol*. 2015;50:1451-61.
3. Ueda M, Mori K, Matsubayashi T. The effects of media reports of suicide by well-known figures between 1989 and 2010 in Japan. *Int J Epidemiol*. 2014;43:623-9.
4. Phillips DP. The influence of suggestion on suicide: substantive and theoretical implications of the Werther effect. *Am Sociol Rev*. 1974;39:340-54.
5. Ruddigkeit, A. Der umgekehrte Werther-Effekt. Eine quasi-experimentelle Untersuchung von Suizidberichterstattung und deutscher Suizidrate. *Publizistik*. 2010;55:253-73.
6. Lee SY. Do effects of copycat suicides vary with reasons for celebrity suicides reported in the media? *Soc Sci J*. 2019 April; doi.org/10.1016/j.soscij.2019.03.003. [Epub ahead of print].

7. Cheng ATA, Hawton K, Lee CTC, Chen THH. The influence of media reporting of the suicide of a celebrity on suicide rates: a population-based study. *Int J Epidemiol.* 2007;36:1229-34.
8. Etzersdorfer E, Voracek M, Sonneck G. A dose-response relationship of imitational suicides and newspaper distribution. *Arch Suicide Res.* 2004;8:137-45.
9. Koepping AP, Ganzenboom HBG, Swanborn PG. Verhoging van suicide door navolging van kranteberichten. *Nederlands Tijdschrift voor de Psychologie.* 1989;44:62-72.
10. Tousignant M, Mishara BL, Caillaud A, Fortin V, St-Laurent D. The impact of media coverage of the suicide of a well-known Quebec reported: the case of Gaetan Girouard. *Soc Sci Med.* 2005;60:1919-26.
11. Cheng Q, Chen F, Yip PSF. Media effects on suicide methods: a case study on Hong Kong 1998-2005. *PLOS One.* 2017;12:e0175580.
12. Stack S. The effect of the media on suicide: evidence from Japan, 1955-1985. *Suicide Life Threat Behav.* 1996;26:132-42.
13. Marzuk PM, Tardiff K, Hirsch CS, et al. Increase in suicide by asphyxiation in New York City after the publication of *Final Exit*. *N Engl J Med.* 1993;329:1508-10.
14. Jonas K. Modelling and suicide: a test of the Werther effect. *Br J Soc Psychology.* 1992;31:295-306
15. Jobes DA, Berman AL, O'Carroll PW, Eastgard S, Knickmeyer S. The Kurt Cobain suicide crisis: perspectives from research, public health and the news media. *Suicide Life Threat Behav.* 1996;26:260-9.
16. Anderson RN, Miniño AM, Hoyert DL, Rosenberg HM. Comparability of cause of death between ICD-9 and ICD-10: preliminary estimates. *Natl Vital Stat Rep.* 2001;49,1-32.
17. Phillips DP, Carstensen LL. Clustering of teenage suicide after television news stories about suicide. *N Engl J Med.* 1986;315:685-9.
18. Romer D, Jamieson PE, Jamieson KH. Are news reports of suicide contagious? A stringent test in six U.S. cities. *J Commun.* 2006;56:253-270.
19. Hassam R. Effects of newspaper stories on the incidence of suicide in Australia: a research note. *Aust N Z J Psychiatry.* 1995;29:480-3.

**Table S1: Detailed Characteristics of the Included Studies with Regards to Study Methods**

| Author and year | Study design                     | Data analysis                                                                         | Method to control for time trends and seasonality                                                                                          | Confounders measured                                                                               | Outcome data source           | Number of time points before intervention                                                                               | Number of time points after intervention                                                                                | Estimate   | Type of estimate               | How estimate was derived*                                                                                                                                |
|-----------------|----------------------------------|---------------------------------------------------------------------------------------|--------------------------------------------------------------------------------------------------------------------------------------------|----------------------------------------------------------------------------------------------------|-------------------------------|-------------------------------------------------------------------------------------------------------------------------|-------------------------------------------------------------------------------------------------------------------------|------------|--------------------------------|----------------------------------------------------------------------------------------------------------------------------------------------------------|
| Bakst 2018      | Multiple arm pre-post comparison | Simple counts in the exposure period and comparisons with averages in control periods | None                                                                                                                                       | None                                                                                               | Central Bureau of Statistics  | 1                                                                                                                       | 1                                                                                                                       | Unadjusted | Expected and observed suicides | Extracted directly using data related to 5 prominent suicides (Table 1)                                                                                  |
| Chang 2015      | Interrupted time series          | Poisson regression                                                                    | Lagged dependent variable (1 week) to detrend data; monthly indicator variables for seasonality; indicator variables for linear time trend | Monthly unemployment and divorce rates and the date of a death of a celebrity by suicide in Taiwan | Taiwan's mortality statistics | N/a: association between linear variable representing number of suicide stories and the suicide rate the following week | N/a: association between linear variable representing number of suicide stories and the suicide rate the following week | Adjusted   | Rate ratio                     | Estimates combined using meta-analysis (using RRs for the 4 newspapers for the previous week and for charcoal and non-charcoal burning suicide, Table 2) |
| Chen 2011       | Interrupted time series          | Poisson regression                                                                    | Indicator variables for day of week and month                                                                                              | Unemployment and divorce rates                                                                     | Taiwan's mortality statistics | N/a: association between linear variable representing number of suicide stories and the suicide rate the next day       | N/a: association between linear variable representing number of suicide stories and the suicide rate the next day       | Adjusted   | Rate ratio                     | Estimates combined using meta-analysis (using RRs for the 3 newspapers for May 2003-Dec 2005, Table 2)                                                   |
| Chen 2012       | Interrupted time series          | Poisson regression                                                                    | Indicator variables for season and calendar year as well as autoregressive terms                                                           | Temperature, humidity and unemployment rates                                                       | Taiwan's mortality statistics | 150                                                                                                                     | 7                                                                                                                       | Adjusted   | Rate ratio                     | Extracted directly (Total suicides in Table 2 and charcoal burning suicides in Table 4)                                                                  |

|                   |                                  |                                  |                                                                                                          |                                                                                            |                                                                |                                                                                                                            |                                                                                                                            |            |                                |                                                                                                       |
|-------------------|----------------------------------|----------------------------------|----------------------------------------------------------------------------------------------------------|--------------------------------------------------------------------------------------------|----------------------------------------------------------------|----------------------------------------------------------------------------------------------------------------------------|----------------------------------------------------------------------------------------------------------------------------|------------|--------------------------------|-------------------------------------------------------------------------------------------------------|
| Chen 2013         | Interrupted time series          | Poisson regression               | Lagged dependent variable (1 day) to detrend data; day of week                                           | None                                                                                       | Taiwan's mortality statistics                                  | N/a: association between linear variable representing number of suicide stories (lagged up to 7 days) and the suicide rate | N/a: association between linear variable representing number of suicide stories (lagged up to 7 days) and the suicide rate | Adjusted   | Rate ratio                     | Extracted directly (Table 1 adjusted estimate for non-charcoal burning as a proxy for total suicides) |
| Cheng 2007        | Interrupted time series          | Poisson regression               | Indicator variables for season and calendar year as well as autoregressive terms                         | Temperature, humidity and unemployment rates                                               | Taiwan's mortality statistics                                  | 121                                                                                                                        | 31                                                                                                                         | Adjusted   | Rate ratio                     | Extracted directly (Total suicides in Table 1 and hanging suicides in Table 2)                        |
| Cheng 2017        | Interrupted time series          | Negative binomial regression     | Lagged dependent variable (1 day) to detrend data, dummies for day of week                               | Property price index, unemployment rate, divorce rate                                      | Hong Kong Coroner's court and Census and Statistics Department | N/a: association between linear variable representing number of suicide stories and the suicide rate the next day          | N/a: association between linear variable representing number of suicide stories and the suicide rate the next day          | Adjusted   | Rate ratio                     | Reanalysis of the data by study authors                                                               |
| Choi 2016         | Interrupted time series          | Instrumental variable regression | Linear term for time and indicator variables for month                                                   | GDP per capita, GDP growth rates, Gini coefficients, unemployment, birth and divorce rates | Statistics Korea                                               | N/a: association between linear variable representing number of suicide stories and the suicide rate in the same month     | N/a: association between linear variable representing number of suicide stories and the suicide rate in the same month     | Adjusted   | Rate ratio                     | Extracted directly (Table 3, IV estimate for news of deaths of Korean celebrities by suicide)         |
| Etzersdorfer 2004 | Multiple arm pre-post comparison | Poisson regression               | Control periods from the 9 preceding and 9 subsequent years (all measured in the same weeks of the year) | None                                                                                       | Statistics Austria                                             | 9                                                                                                                          | 10                                                                                                                         | Unadjusted | Rate ratio                     | Reanalysis of the data by study authors                                                               |
| Fink 2018         | Interrupted time series          | SARIMA                           | First differencing (monthly and yearly), monthly and yearly moving average terms                         | None                                                                                       | U.S. CDC, Wonder database                                      | 187                                                                                                                        | 2                                                                                                                          | Adjusted   | Expected and observed suicides | Extracted directly (Table 1, total population, August and September; Table 2, suffocation,            |

|               |                                  |                    |                                                                                                                                                                                                               |                                                                      |                                                                              |                                                                                                                                    |                                                                                                                                    |            |                                |                                                                                   |
|---------------|----------------------------------|--------------------|---------------------------------------------------------------------------------------------------------------------------------------------------------------------------------------------------------------|----------------------------------------------------------------------|------------------------------------------------------------------------------|------------------------------------------------------------------------------------------------------------------------------------|------------------------------------------------------------------------------------------------------------------------------------|------------|--------------------------------|-----------------------------------------------------------------------------------|
|               |                                  |                    |                                                                                                                                                                                                               |                                                                      |                                                                              |                                                                                                                                    |                                                                                                                                    |            |                                | August and September)                                                             |
| Fu 2009       | Interrupted time series          | Poisson regression | Indicator variables for season and calendar year as well as autoregressive terms                                                                                                                              | Monthly unemployment rates                                           | Hong Kong Census and Statistics Department and the Coroner's court           | 117                                                                                                                                | 39                                                                                                                                 | Adjusted   | Rate ratio                     | Extracted directly (Figure 2A, Overall Hong Kong and Figure 2C, Method Hong Kong) |
| Hagihara 2007 | Interrupted time series          | Linear regression  | Log transformation of the outcome variable to make the series stationary, indicator variable for month                                                                                                        | Percent households with Internet use and national unemployment rates | Vital and Health Statistics, Japanese Ministry of Health, Labor, and Welfare | N/a: association between news stories and the suicide rate in the following month                                                  | N/a: association between news stories and the suicide rate in the following month                                                  | Adjusted   | Rate ratio                     | Extracted directly (Table 2 males and Table 2 females)                            |
| Jobes 1996    | Multiple arm pre-post comparison | Simple counts      | Comparison periods were the same weeks in year before and after the death of a celebrity by suicide                                                                                                           | None                                                                 | Unknown                                                                      | 5                                                                                                                                  | 7                                                                                                                                  | Unadjusted | Rate ratio                     | Extracted directly (Figure 2)                                                     |
| Jonas 1992    | Multiple arm pre-post comparison | Linear regression  | Control periods from two adjacent years from the same days as during exposure year, indicator variables for month, linear term for year, and adjustment to the standard errors to account for autocorrelation | None                                                                 | Statistical Office of Baden Württemberg                                      | N/a: indicator variable coded 1 for the 7 days after date each celebrity died by suicide regressed on the daily suicide rate       | N/a: indicator variable coded 1 for the 7 days after date each celebrity died by suicide regressed on the daily suicide rate       | Adjusted   | Expected and observed suicides | Extracted directly (Table 1, 14 prominent persons where data was available)       |
| Kessler 1989  | Interrupted time series          | Linear regression  | Lagged dependent variable (1 day) to detrend data; indicator variables for day of week; month; year                                                                                                           | Indicator variables for nine major holidays                          | National Center of Health Statistics Detailed Mortality File                 | N/a: model tested association between an indicator variable coded 1 for the 8 days after each of the 87 news stories (0 otherwise) | N/a: model tested association between an indicator variable coded 1 for the 8 days after each of the 87 news stories (0 otherwise) | Adjusted   | Rate ratio                     | Extracted directly (Table 2, 1973-1984 total estimate)                            |

|               |                                  |                              |                                                                                                                                                                           |                    |                                            |                                                                                                                                                              |                                                                                                                                                              |            |                                |                                                                                                    |
|---------------|----------------------------------|------------------------------|---------------------------------------------------------------------------------------------------------------------------------------------------------------------------|--------------------|--------------------------------------------|--------------------------------------------------------------------------------------------------------------------------------------------------------------|--------------------------------------------------------------------------------------------------------------------------------------------------------------|------------|--------------------------------|----------------------------------------------------------------------------------------------------|
|               |                                  |                              |                                                                                                                                                                           |                    |                                            | and daily suicide counts                                                                                                                                     | and daily suicide counts                                                                                                                                     |            |                                |                                                                                                    |
| Koburger 2015 | Multiple arm pre-post comparison | Negative binomial regression | Control periods from 8 weeks prior to the index suicide                                                                                                                   | None               | OSPI study (national statistical offices)  | 8                                                                                                                                                            | 2                                                                                                                                                            | Unadjusted | Rate ratio                     | Extracted directly (Table 2, all four countries except Germany)                                    |
| Koepping 1989 | Interrupted time series          | Poisson regression           | Linear term for trend, indicator variables for week and month                                                                                                             | None               | Central Bureau for Statistics CBS          | N/a: model tested association between an indicator variable coded 1 for the 7 days after each of the 126 news stories (0 otherwise) and daily suicide counts | N/a: model tested association between an indicator variable coded 1 for the 7 days after each of the 126 news stories (0 otherwise) and daily suicide counts | Adjusted   | Expected and observed suicides | Extracted directly (Table 3)                                                                       |
| Ladwig 2012   | Single-arm pre-post comparison   | Poisson regression           | None: but additional analysis conducted in the period after the intervention period compared to same period in previous years indicated no differences across these years | Daily temperature  | German Railway Event Database              | 1                                                                                                                                                            | 1                                                                                                                                                            | Adjusted   | Rate ratio                     | Extracted directly (Table 2)                                                                       |
| Lee 2019      | Interrupted time series          | Linear regression            | Indicator variables for month and year                                                                                                                                    | Unemployment rates | Statistics Korea                           | N/a: association between indicator variable representing the two weeks after each celebrity died by suicide and suicide counts                               | N/a: association between indicator variable representing the two weeks after each celebrity died by suicide and suicide counts                               | Adjusted   | Coefficient                    | Coefficient (from Table 2) converted to a rate using the midpoint population estimate (in Table 1) |
| Mockus 2018   | Interrupted time series          | Poisson regression           | Indicator variables for year-month, day of week, day of month and holidays                                                                                                | None               | U.S. National Center for Health Statistics | N/a: association between indicator variable representing                                                                                                     | N/a: association between indicator variable representing                                                                                                     | Adjusted   | Rate ratio                     | Extracted directly (Table 8, $k = 2$ )                                                             |



|                         |                                  |                                                                                       |                                                                                                                                           |                                                             |                                                  |                                                                                                                            |                                                                                                                            |            |                                |                                                                |
|-------------------------|----------------------------------|---------------------------------------------------------------------------------------|-------------------------------------------------------------------------------------------------------------------------------------------|-------------------------------------------------------------|--------------------------------------------------|----------------------------------------------------------------------------------------------------------------------------|----------------------------------------------------------------------------------------------------------------------------|------------|--------------------------------|----------------------------------------------------------------|
|                         |                                  |                                                                                       |                                                                                                                                           |                                                             |                                                  | that the date is within $k$ days since the celebrity died by suicide ( $k = 1, 2, \dots, 30$ days) and the suicide rate    | that the date is within $k$ days since the celebrity died by suicide ( $k = 1, 2, \dots, 30$ days) and the suicide rate    |            |                                |                                                                |
| Niederkröntenhaler 2009 | Multiple arm pre-post comparison | Poisson regression                                                                    | Indicator variables for month and year                                                                                                    | Density of any suicide-related reporting                    | Statistics Austria                               | 1                                                                                                                          | 1                                                                                                                          | Adjusted   | Rate ratio                     | Reanalysis of the data by study authors                        |
| Phillips 1974           | Multiple arm pre-post comparison | Simple counts in the exposure period and comparisons with averages in control periods | Control period for each publicised suicide is the average number of suicides in same month in the preceding and subsequent year           | None                                                        | U.S. National Center for Health Statistics       | 1                                                                                                                          | 1                                                                                                                          | Unadjusted | Expected and observed suicides | Extracted directly (Table 1)                                   |
| Pirkis 2020             | Interrupted time series          | Poisson regression                                                                    | Fractional polynomials to model underlying trend, sine and cosine terms for seasonality                                                   | None                                                        | Australia's National Coronial Information System | 4972                                                                                                                       | 873                                                                                                                        | Adjusted   | Rate ratio                     | Reanalysis of the data by study authors                        |
| Queinec 2011            | Interrupted time series          | SARIMA                                                                                | Not specified, but SAIRMA models allow a variety of adjustments including first differencing and moving average and autocorrelation terms | None                                                        | French Exhaustive Death Registry                 | N/a: association between indicator variable representing the month after each celebrity died by suicide and suicide counts | N/a: association between indicator variable representing the month after each celebrity died by suicide and suicide counts | Adjusted   | Expected and observed suicides | Extracted directly (total and method-specific in Table 1)      |
| Romer 2006              | Multiple arm pre-post comparison | Negative binomial regression                                                          | Lagged dependent variables (9 days) and indicator variables for day of week and month                                                     | Soap opera depictions, movies shown on local screens, movie | US State Health Departments                      | N/a: association between linear variable representing number of                                                            | N/a: association between linear variable representing number of                                                            | Adjusted   | Expected and observed suicides | Extracted directly (expected Table 5, observed, text page 264) |

|                 |                                  |                                                                                       |                                                                                                                                                             |                                                |                                                                    |                                                                                                                               |                                                                                                                               |            |                                |                                                                                                 |
|-----------------|----------------------------------|---------------------------------------------------------------------------------------|-------------------------------------------------------------------------------------------------------------------------------------------------------------|------------------------------------------------|--------------------------------------------------------------------|-------------------------------------------------------------------------------------------------------------------------------|-------------------------------------------------------------------------------------------------------------------------------|------------|--------------------------------|-------------------------------------------------------------------------------------------------|
|                 |                                  |                                                                                       |                                                                                                                                                             | rentals, two major holidays                    |                                                                    | suicide stories (lagged up to 9 days) and the suicide rate                                                                    | suicide stories (lagged up to 9 days) and the suicide rate                                                                    |            |                                |                                                                                                 |
| Ruddigkeit 2010 | Multiple arm pre-post comparison | t-test                                                                                | None                                                                                                                                                        | None                                           | Deutsche Mortalitätsstatistik / Stat. Landesämter                  | 1                                                                                                                             | 1                                                                                                                             | Unadjusted | Expected and observed suicides | Extracted directly (Table 1)                                                                    |
| Schafer 2015    | Multiple arm pre-post comparison | Simple counts in the exposure period and comparisons with averages in control periods | Compared weeks post to expected number based on mean from suicide count in previous and subsequent year using the same week and same succession of weekdays | None                                           | German mortality statistics from German federal statistical office | 1                                                                                                                             | 4                                                                                                                             | Unadjusted | Expected and observed suicides | Extracted directly (Total suicides in Figure 3 and method-specific suicides in Figure 4)        |
| Stack 1996      | Interrupted time series          | Linear regression                                                                     | Lagged dependent variable (1 month) to detrend data and adjustment to the standard errors for autocorrelation; monthly indicator variables for seasonality  | Publicised stories about non-Japanese suicides | Chew 1992: Suicide data for Japan 1955-85 personal communication   | N/a: association between news stories and the suicide rate in the same month                                                  | N/a: association between news stories and the suicide rate in the same month                                                  | Adjusted   | Rate ratio                     | Extracted directly (Table 1 coefficient for Japanese celebrities and coefficient for intercept) |
| Ueda 2014       | Interrupted time series          | Poisson regression                                                                    | Indicator variables for year-month, day of the week and a term for day                                                                                      | None                                           | Vital statistics of Japan, Ministry of Health, Labour and Welfare  | N/a: indicator variable coded 1 for the 10 days after date each celebrity died by suicide regressed on the daily suicide rate | N/a: indicator variable coded 1 for the 10 days after date each celebrity died by suicide regressed on the daily suicide rate | Adjusted   | Rate ratio                     | Extracted directly (text, page 626)                                                             |
| Ueda 2017       | Interrupted time series          | Poisson regression                                                                    | Indicator variables for year-month, day of the week and a term for day number within month                                                                  | None                                           | Vital statistics of Japan, Ministry of Health, Labour and Welfare  | N/a: indicator variable coded 1 for the 10 days after date each celebrity died by suicide regressed on                        | N/a: indicator variable coded 1 for the 10 days after date each celebrity died by suicide regressed on                        | Adjusted   | Rate ratio                     | Reanalysis of the data by study authors                                                         |

|              |                         |        |                                                                                  |      |                   | the daily suicide rate | the daily suicide rate |          |                                |                                                                                                         |
|--------------|-------------------------|--------|----------------------------------------------------------------------------------|------|-------------------|------------------------|------------------------|----------|--------------------------------|---------------------------------------------------------------------------------------------------------|
| Whitley 2019 | Interrupted time series | SARIMA | First differencing (monthly and yearly), monthly and yearly moving average terms | None | Statistics Canada | 187                    | 2                      | Adjusted | Expected and observed suicides | Extracted directly (Table 1, overall for August and September and suffocation for August and September) |

\* Table numbers refer to specific table as published in respective study.

**Table S2: Risk of bias ratings of included studies**

| Author and year        | Q1-a | Q1-b | Q1-c | Q1-d | Q1-total | Q2       | Q3  | Q4       | Q5      | Q6-a | Q6-b | Q6-c | Q6-total | Total risk of bias |
|------------------------|------|------|------|------|----------|----------|-----|----------|---------|------|------|------|----------|--------------------|
| Bakst 2018             | Yes  | Yes  | No   | Yes  | Serious  | Low      | Low | Low      | Low     | No   | No   | No   | Moderate | Serious            |
| Chang 2015             | No   | No   | No   | No   | Moderate | Moderate | Low | Low      | Low     | No   | No   | No   | Moderate | Moderate           |
| Chen 2011              | No   | No   | No   | No   | Moderate | Low      | Low | Low      | Low     | No   | No   | No   | Moderate | Moderate           |
| Chen 2012              | No   | No   | No   | No   | Moderate | Low      | Low | Low      | Low     | No   | No   | No   | Moderate | Moderate           |
| Chen 2013              | No   | No   | No   | Yes  | Moderate | Low      | Low | Low      | Low     | No   | No   | No   | Moderate | Moderate           |
| Cheng 2007             | No   | No   | No   | No   | Moderate | Low      | Low | Low      | Low     | No   | No   | No   | Moderate | Moderate           |
| Cheng 2017             | No   | No   | No   | No   | Moderate | Moderate | Low | Low      | Low     | No   | No   | No   | Moderate | Moderate           |
| Choi 2016              | No   | No   | No   | No   | Moderate | Moderate | Low | Low      | Low     | No   | No   | No   | Moderate | Moderate           |
| Etzersdorfer 2004      | No   | No   | No   | Yes  | Moderate | Low      | Low | Low      | Low     | No   | No   | No   | Moderate | Moderate           |
| Fink 2018              | No   | No   | No   | Yes  | Moderate | Moderate | Low | Low      | Low     | No   | No   | No   | Moderate | Moderate           |
| Fu 2009                | No   | No   | No   | No   | Moderate | Low      | Low | Low      | Low     | No   | No   | No   | Moderate | Moderate           |
| Hagihara 2007          | No   | No   | No   | No   | Moderate | Serious  | Low | Low      | Low     | No   | No   | No   | Moderate | Serious            |
| Jobes 1996             | No   | No   | No   | Yes  | Serious  | Moderate | Low | Unknown  | Serious | No   | No   | No   | Moderate | Serious            |
| Jonas 1992             | No   | No   | No   | Yes  | Moderate | Low      | Low | Moderate | Low     | No   | No   | No   | Moderate | Moderate           |
| Kessler 1989           | No   | No   | No   | No   | Moderate | Low      | Low | Low      | Low     | No   | No   | No   | Moderate | Moderate           |
| Koburger 2015          | No   | Yes  | No   | Yes  | Serious  | Low      | Low | Low      | Low     | No   | No   | No   | Moderate | Serious            |
| Koepfing 1989          | No   | No   | No   | Yes  | Serious  | Low      | Low | Low      | Low     | No   | No   | No   | Moderate | Serious            |
| Ladwig 2012            | Yes  | Yes  | No   | No   | Moderate | Low      | Low | Low      | Low     | No   | No   | No   | Moderate | Moderate           |
| Lee 2019               | No   | Yes  | No   | No   | Serious  | Low      | Low | Low      | Low     | No   | No   | No   | Moderate | Serious            |
| Mockus 2018            | No   | No   | No   | No   | Moderate | Low      | Low | Low      | Low     | Yes  | No   | No   | Serious  | Serious            |
| Niederkrötenhaler 2009 | Yes  | No   | No   | No   | Moderate | Low      | Low | Low      | Low     | No   | No   | No   | Moderate | Moderate           |
| Phillips 1974          | Yes  | No   | No   | Yes  | Serious  | Serious  | Low | Low      | Low     | No   | No   | No   | Moderate | Serious            |
| Pirkis 2020            | No   | No   | No   | Yes  | Moderate | Low      | Low | Low      | Low     | No   | No   | No   | Moderate | Moderate           |
| Queinec 2011           | No   | No   | No   | Yes  | Moderate | Low      | Low | Low      | Low     | No   | No   | No   | Moderate | Moderate           |
| Romer 2006             | No   | No   | No   | No   | Moderate | Low      | Low | Low      | Low     | Yes  | No   | Yes  | Serious  | Serious            |
| Ruddigkeit 2010        | Yes  | Yes  | No   | Yes  | Serious  | Low      | Low | Low      | Low     | No   | No   | No   | Moderate | Serious            |

|              |    |    |    |     |          |          |     |          |     |    |    |    |          |          |
|--------------|----|----|----|-----|----------|----------|-----|----------|-----|----|----|----|----------|----------|
| Schafer 2015 | No | No | No | Yes | Moderate | Low      | Low | Moderate | Low | No | No | No | Moderate | Moderate |
| Stack 1996   | No | No | No | No  | Moderate | Serious  | Low | Low      | Low | No | No | No | Moderate | Serious  |
| Ueda 2014    | No | No | No | Yes | Moderate | Low      | Low | Low      | Low | No | No | No | Moderate | Moderate |
| Ueda 2017    | No | No | No | Yes | Moderate | Low      | Low | Low      | Low | No | No | No | Moderate | Moderate |
| Whitley 2019 | No | No | No | Yes | Moderate | Moderate | Low | Low      | Low | No | No | No | Moderate | Moderate |

Abbreviations: Q1-a = Risk of bias due to confounding A: Sufficient pre-intervention time-points measured; Q1-b = Risk of bias due to confounding B: appropriate analysis method that accounts for time trends; Q1-c = Risk of bias due to confounding C: Seasonality; Q1-d = Risk of bias due to confounding D: Confounders measured and controlled for; Q1-total = Risk of bias due to confounding; Q2 = Risk of bias in classification of studies; Q3 = Risk of bias due to deviations from intended interventions / preparatory phases; Q4 = Risk of bias due to missing data; Q5 = Risk of bias in measurement of the outcome; Q6-a = Risk of bias in selection of results: selection of time point within series; Q6-b = Risk of bias in selection of results: selection of method from several conducted methods; Q6-c = Risk of bias in selection of results: Selection of results because of interest, but more results available; Q6-total = Risk of bias in selection of results.

**Table S3: Multivariate meta-regressions of the effect of reporting of deaths of celebrities by suicide on total suicides by study factors (all studies at moderate risk of bias)**

|                              | Number of studies | RR (95% CI) <sup>a</sup> | P-value |
|------------------------------|-------------------|--------------------------|---------|
| <b>Period published</b>      |                   |                          | 0.62    |
| ≤2005                        | 2                 | 1.17 (1.00 to 1.37)      |         |
| 2006 to 2010                 | 3                 | 1.17 (1.05 to 1.31)      |         |
| 2011 to 2015                 | 4                 | 1.12 (1.01 to 1.25)      |         |
| ≥2016                        | 5                 | 1.17 (1.11 to 1.23)      |         |
|                              |                   |                          |         |
| <b>Number of celebrities</b> |                   |                          | 0.27    |
| 1                            | 7                 | 1.17 (1.00 to 1.37)      |         |
| ≥2                           | 7                 | 1.11 (0.98 to 1.26)      |         |
|                              |                   |                          |         |

<sup>a</sup> The rate ratio in each category calculated using the exponential of the linear combination of coefficients from the meta-regression model.

**Table S4: Univariate meta-regressions of the effect of method-specific reporting of deaths of celebrities by suicides on total suicides by study factors (all studies at moderate risk of bias)**

|                                     | Number of studies | RR (95% CI) <sup>a</sup> | P-value | I <sup>2</sup> |
|-------------------------------------|-------------------|--------------------------|---------|----------------|
| <b>Method</b>                       |                   |                          | 0.58    | 66.4%          |
| Hanging                             | 4                 | 1.34 (1.15 to 1.55)      |         |                |
| Other methods                       | 7                 | 1.27 (1.09 to 1.47)      |         |                |
| <b>Period published</b>             |                   |                          | 0.94    | 76.3%          |
| ≤2010                               | 4                 | 1.35 (1.06 to 1.70)      |         |                |
| 2011 to 2015                        | 4                 | 1.28 (1.04 to 1.58)      |         |                |
| ≥2016                               | 3                 | 1.30 (1.07 to 1.58)      |         |                |
| <b>Location</b>                     |                   |                          | 0.92    | 76.3%          |
| Asia                                | 3                 | 1.36 (1.03 to 1.80)      |         |                |
| Europe                              | 5                 | 1.29 (1.07 to 1.55)      |         |                |
| North America/Australia             | 3                 | 1.30 (1.07 to 1.58)      |         |                |
| <b>Celebrity recognition</b>        |                   |                          | 0.52    | 72.3%          |
| Local                               | 4                 | 1.39 (1.09 to 1.77)      |         |                |
| International                       | 7                 | 1.28 (1.14 to 1.44)      |         |                |
| <b>Celebrity type</b>               |                   |                          | 0.72    | 68.9%          |
| Entertainer                         | 6                 | 1.32 (1.15 to 1.52)      |         |                |
| Other                               | 5                 | 1.28 (1.08 to 1.51)      |         |                |
| <b>Study length (per 1000 days)</b> | 11                | 0.99 (0.96 to 1.03)      | 0.74    | 76.8%          |
| <b>Unit of analysis</b>             |                   |                          |         |                |
| Day                                 | 6                 | 1.25 (1.07 to 1.47)      | 0.73    | 69.6%          |
| Week                                | 3                 | 1.37 (1.04 to 1.79)      |         |                |
| Month                               | 2                 | 1.35 (1.09 to 1.67)      |         |                |
| <b>Adjustment for confounders</b>   |                   |                          | 0.44    | 75.8%          |
| No                                  | 6                 | 1.27 (1.11 to 1.45)      |         |                |
| Yes                                 | 5                 | 1.38 (1.14 to 1.65)      |         |                |

<sup>a</sup> The rate ratio in each category calculated using the exponential of the linear combination of coefficients from the meta-regression model.

\* Heterogeneity remaining after meta-regression.

**Figure S1: Forest plot for sensitivity analyses (all studies at moderate and serious risk of bias).**

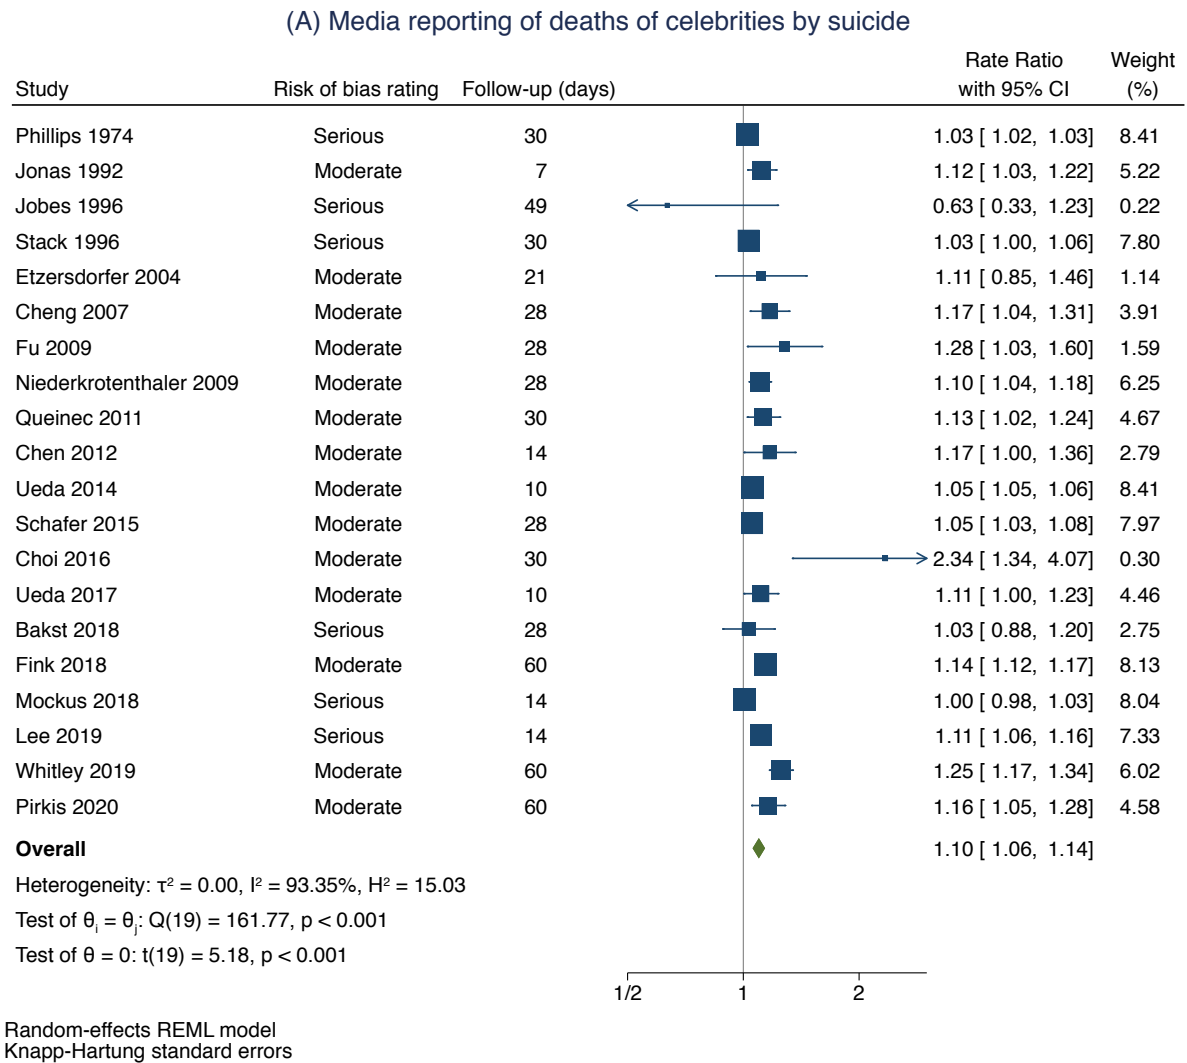



### (B) Reporting of method of suicide used by a celebrity

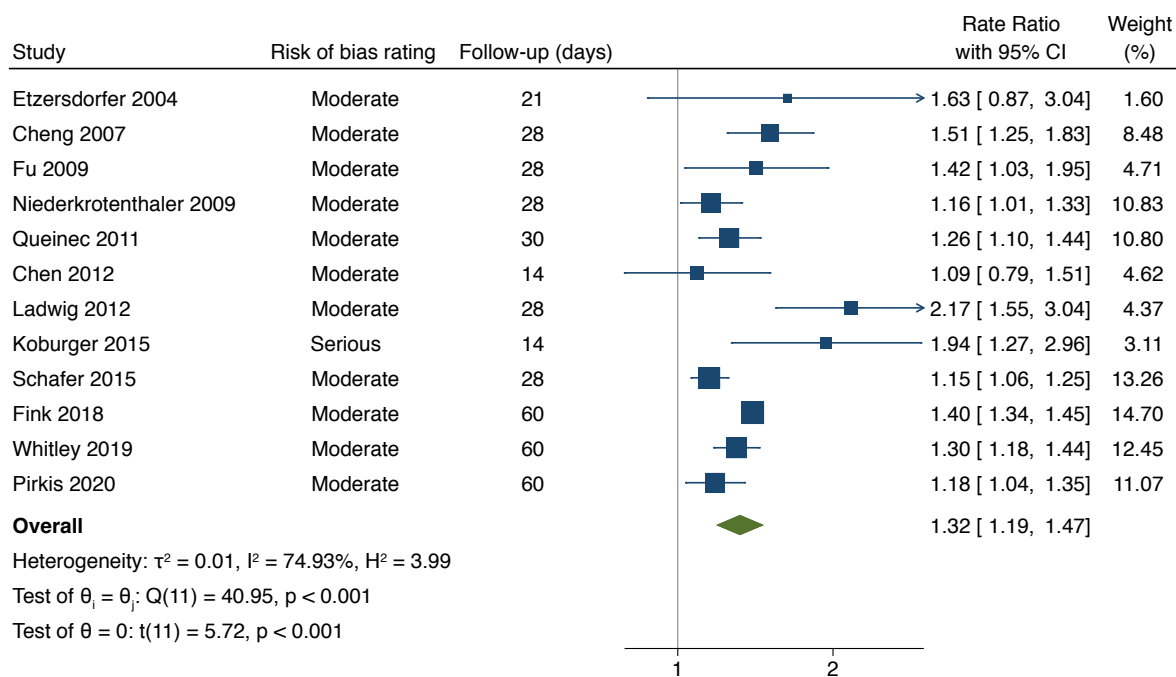

Random-effects REML model  
 Knapp-Hartung standard errors

### (C) General reporting of suicide

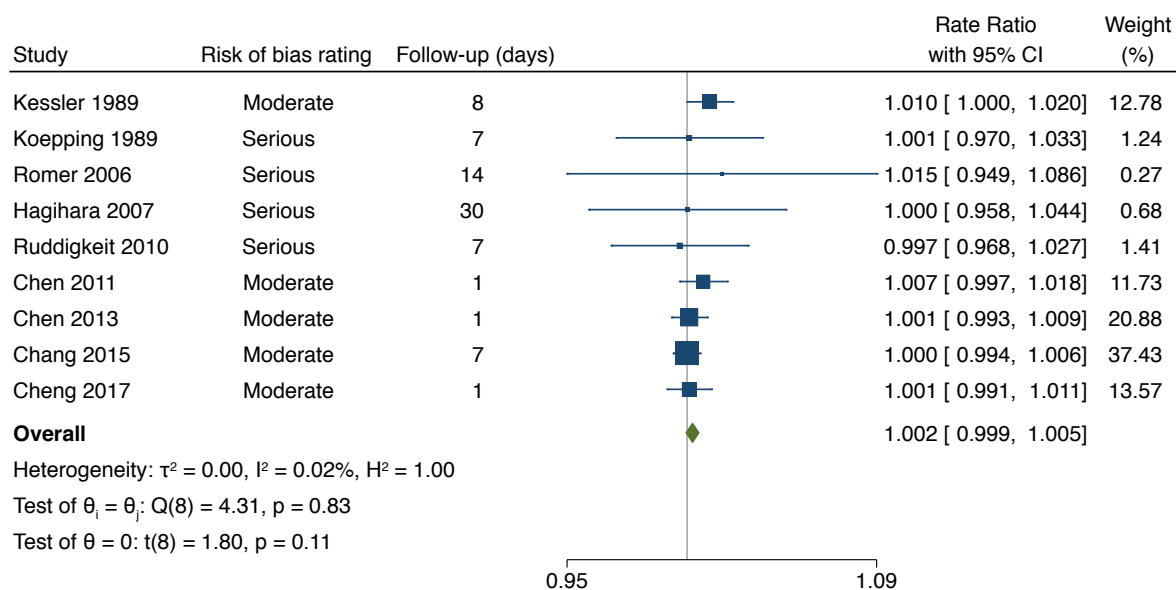

Random-effects REML model  
 Knapp-Hartung standard errors

**Table S5. Univariate meta-regressions of the effect of reporting on deaths of celebrities by suicide on total suicides by study factors (all studies at moderate and serious risk of bias)**

|                                     | Number of studies | RR (95% CI) <sup>a</sup> | P-value | I <sup>2</sup> <sup>b</sup> |
|-------------------------------------|-------------------|--------------------------|---------|-----------------------------|
| <b>Period published</b>             |                   |                          | 0.42    | 86.8%                       |
| ≤2005                               | 5                 | 1.05 (0.97 to 1.14)      |         |                             |
| 2006 to 2010                        | 3                 | 1.15 (1.03 to 1.28)      |         |                             |
| 2011 to 2015                        | 4                 | 1.08 (1.00 to 1.17)      |         |                             |
| ≥2016                               | 8                 | 1.12 (1.06 to 1.19)      |         |                             |
| <b>Follow-up time</b>               |                   |                          | 0.48    | 89.6%                       |
| ≤14 days                            | 6                 | 1.08 (1.01 to 1.15)      |         |                             |
| ≥15 days                            | 14                | 1.11 (1.06 to 1.16)      |         |                             |
| <b>Location</b>                     |                   |                          | 0.95    | 90.7%                       |
| Asia                                | 8                 | 1.11 (1.03 to 1.18)      |         |                             |
| Europe                              | 6                 | 1.09 (1.01 to 1.18)      |         |                             |
| North America/Australia             | 6                 | 1.10 (1.03 to 1.18)      |         |                             |
| <b>Study design</b>                 |                   |                          | 0.23    | 89.3%                       |
| Multiple arm pre-post comparison    | 7                 | 1.06 (0.99 to 1.13)      |         |                             |
| Interrupted time-series analysis    | 13                | 1.11 (1.07 to 1.17)      |         |                             |
| <b>Study length (per 1000 days)</b> | 20                | 1.00 (0.99 to 1.01)      | 0.50    | 93.2%                       |
| <b>Unit of analysis</b>             |                   |                          | 0.52    | 90.7%                       |
| Day                                 | 10                | 1.08 (1.03 to 1.14)      |         |                             |
| Week                                | 4                 | 1.17 (1.03 to 1.34)      |         |                             |
| Month                               | 6                 | 1.10 (1.03 to 1.18)      |         |                             |
| <b>Adjustment for confounders</b>   |                   |                          | 0.51    | 94.0%                       |
| No                                  | 13                | 1.09 (1.04 to 1.14)      |         |                             |
| Yes                                 | 7                 | 1.12 (1.04 to 1.20)      |         |                             |
| <b>Celebrity recognition</b>        |                   |                          | 0.05    | 85.4%                       |
| Local                               | 7                 | 1.12 (1.05 to 1.20)      |         |                             |
| International                       | 4                 | 1.17 (1.09 to 1.26)      |         |                             |
| Local and international             | 9                 | 1.06 (1.02 to 1.10)      |         |                             |
| <b>Celebrity type</b>               |                   |                          | 0.002   | 81.4%                       |
| Entertainer                         | 7                 | 1.17 (1.11 to 1.24)      |         |                             |
| Other                               | 13                | 1.06 (1.03 to 1.09)      |         |                             |
| <b>Number of celebrities</b>        |                   |                          | 0.002   | 81.2%                       |
| 1                                   | 8                 | 1.17 (1.11 to 1.24)      |         |                             |
| ≥2                                  | 12                | 1.06 (1.03 to 1.09)      |         |                             |

<sup>a</sup> The rate ratio in each category calculated using the exponential of the linear combination of coefficients from the meta-regression model.

<sup>b</sup> Heterogeneity remaining after meta-regression.

**Table S6: Univariate meta-regressions of the effect of method-specific reporting of deaths of celebrities by suicide on total suicides by study factors (all studies at moderate and serious risk of bias)**

|                                     | Number of studies | RR (95% CI) <sup>a</sup> | P-value | I <sup>2</sup> <sup>b</sup> |
|-------------------------------------|-------------------|--------------------------|---------|-----------------------------|
| <b>Method</b>                       |                   |                          | 0.91    | 75.5%                       |
| Hanging                             | 8                 | 1.34 (1.12 to 1.59)      |         |                             |
| Other methods                       | 4                 | 1.32 (1.13 to 1.55)      |         |                             |
|                                     |                   |                          |         |                             |
| <b>Period published</b>             |                   |                          | 0.94    | 79.3%                       |
| ≤2010                               | 4                 | 1.35 (1.06 to 1.73)      |         |                             |
| 2011 to 2015                        | 5                 | 1.35 (1.09 to 1.66)      |         |                             |
| ≥2016                               | 3                 | 1.30 (1.05 to 1.61)      |         |                             |
|                                     |                   |                          |         |                             |
| <b>Location</b>                     |                   |                          | 0.94    | 79.3%                       |
| Asia                                | 3                 | 1.36 (1.02 to 1.81)      |         |                             |
| Europe                              | 6                 | 1.35 (1.11 to 1.63)      |         |                             |
| North America/Australia             | 3                 | 1.30 (1.05 to 1.61)      |         |                             |
|                                     |                   |                          |         |                             |
| <b>Celebrity recognition</b>        |                   |                          | 0.65    | 76.2%                       |
| Local                               | 4                 | 1.39 (1.07 to 1.79)      |         |                             |
| International                       | 8                 | 1.31 (1.15 to 1.48)      |         |                             |
|                                     |                   |                          |         |                             |
| <b>Celebrity type</b>               |                   |                          | 0.86    | 77.8%                       |
| Entertainer                         | 6                 | 1.32 (1.12 to 1.55)      |         |                             |
| Other                               | 6                 | 1.35 (1.12 to 1.61)      |         |                             |
|                                     |                   |                          |         |                             |
| <b>Study length (per 1000 days)</b> | 12                | 0.99 (0.96 to 1.02)      | 0.51    | 79.5%                       |
|                                     |                   |                          |         |                             |
| <b>Unit of analysis</b>             |                   |                          | 0.66    | 76.3%                       |
| Day                                 | 6                 | 1.27 (1.07 to 1.50)      |         |                             |
| Week                                | 4                 | 1.44 (1.12 to 1.85)      |         |                             |
| Month                               | 2                 | 1.35 (1.06 to 1.72)      |         |                             |
|                                     |                   |                          |         |                             |
| <b>Adjustment for confounders</b>   |                   |                          | 0.58    | 77.8%                       |
| No                                  | 7                 | 1.30 (1.13 to 1.49)      |         |                             |
| Yes                                 | 5                 | 1.38 (1.13 to 1.68)      |         |                             |

<sup>a</sup> The rate ratio in each category calculated using the exponential of the linear combination of coefficients from the meta-regression model.

<sup>b</sup> Heterogeneity remaining after meta-regression.

**Figure S2: Funnel plot for sensitivity analyses (all studies at moderate and serious risk of bias)**

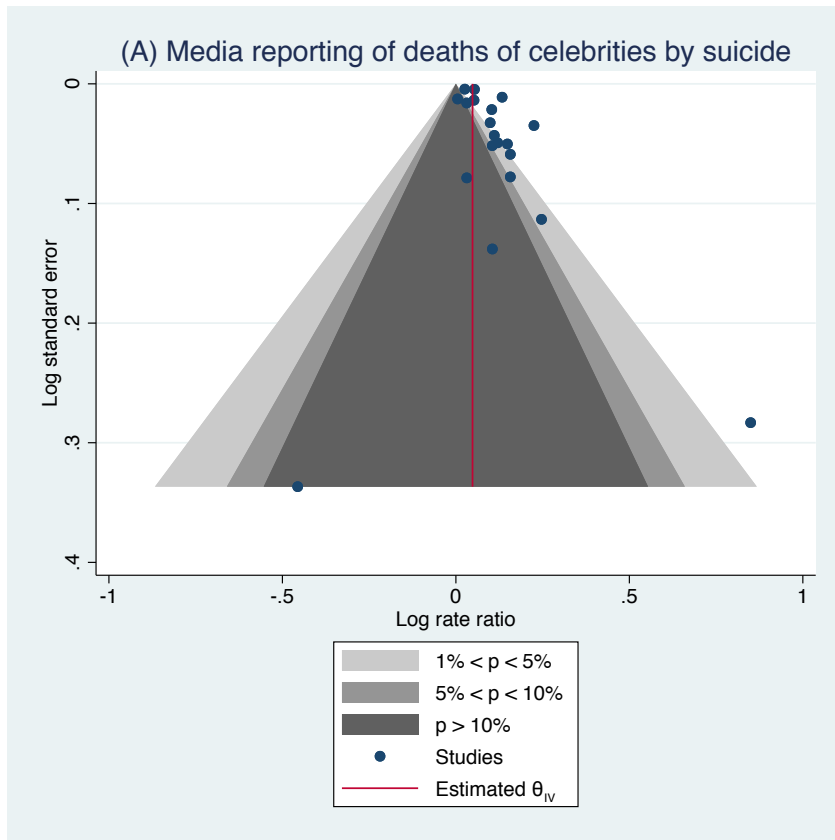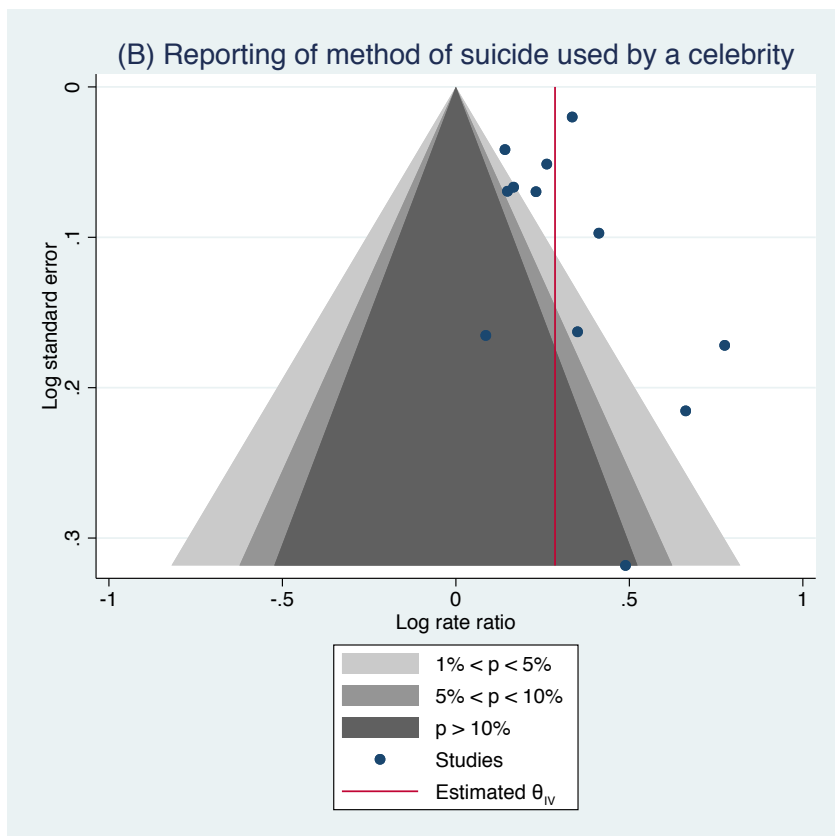

(C) General reporting of suicide

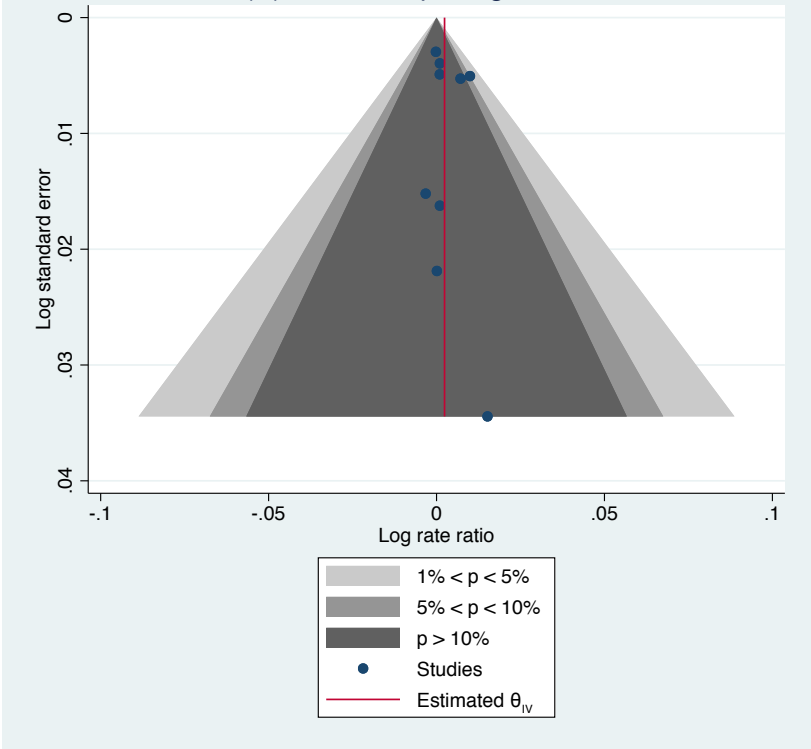

Supplement: niet051763.ww.pdf [file niet051763.ww.pdf]
